# Supplementary material for: Deep learning assisted holography microscopy for in-flow enumeration of tumor cells in blood
Source: RSC Adv. 2023 Feb 2;13(7):4222–35. doi: 10.1039/d2ra07972k (PMC9892890; doi:10.1039/d2ra07972k)
Supplement: RA-013-D2RA07972K-s001 [file RA-013-D2RA07972K-s001.pdf]

# Deep Learning Assisted Holography Microscopy for In-Flow Enumeration of Tumor Cells in Blood

Anirudh Gangadhar<sup>[1]</sup>, Hamed Sari-Sarraf<sup>[2]</sup> and Siva A. Vanapalli<sup>[1]</sup>

<sup>[1]</sup> Department of Chemical Engineering, Texas Tech University, Lubbock, TX 79409

<sup>[2]</sup> Department of Electrical and Computer Engineering, Texas Tech University, Lubbock, TX 79409

## Supplementary Information

Table S1: s-Net versus other CNNs using reduced dataset ( $N_{train} = 3500, N_{test} = 1500$ )

| CNN Network       | Learnable parameters | Accuracy | Sensitivity | Specificity | Inference time (sec) |
|-------------------|----------------------|----------|-------------|-------------|----------------------|
| s-Net (this work) | 11,000               | 98.97%   | 97.68%      | 98.46%      | 4                    |
| LeNet-5           | 61,310               | 97.09%   | 97.02%      | 97.16%      | 5                    |
| MobileNet-v2      | 3.5 million          | 97.54%   | 96.33%      | 98.76%      | 21                   |
| ResNet-50         | 25.5 million         | 97.55%   | 96.77%      | 98.34%      | 20                   |

Table S2: MCF-7 ground truth and ML prediction counts for  $C_{WBC} = 1000/mL$

| Target | Ground truth conc. (/mL) |         |         |        |       | ML-predicted conc. (/mL) |         |         |      |       |
|--------|--------------------------|---------|---------|--------|-------|--------------------------|---------|---------|------|-------|
|        | Donor 1                  | Donor 2 | Donor 3 | Mean   | SD    | Donor 1                  | Donor 2 | Donor 3 | Mean | SD    |
| 0      | 0                        | 0       | 0       | 0      | 0     | 1                        | 1       | 2       | 1.33 | 0.58  |
| 10     | 12                       | 7       | 9       | 9.33   | 2.52  | 7                        | 1       | 5       | 4.33 | 3.06  |
| 100    | 83                       | 115     | 94      | 97.33  | 16.26 | 30                       | 37      | 41      | 36   | 5.57  |
| 1000   | 1040                     | 925     | 917     | 960.67 | 68.82 | 183                      | 243     | 225     | 217  | 30.79 |

Table S3: MCF-7 ground truth and ML prediction counts for  $C_{WBC} = 5000/mL$

| Target | Ground truth conc. (/mL) |         |         |        |       | ML-predicted conc. (/mL) |         |         |        |       |
|--------|--------------------------|---------|---------|--------|-------|--------------------------|---------|---------|--------|-------|
|        | Donor 1                  | Donor 2 | Donor 3 | Mean   | SD    | Donor 1                  | Donor 2 | Donor 3 | Mean   | SD    |
| 0      | 0                        | 0       | 0       | 0      | 0     | 3                        | 2       | 2       | 2.33   | 0.58  |
| 10     | 9                        | 8       | 9       | 8.67   | 0.58  | 4                        | 2       | 7       | 4.33   | 2.52  |
| 100    | 92                       | 120     | 86      | 99.33  | 18.15 | 31                       | 42      | 29      | 34     | 7     |
| 1000   | 945                      | 1010    | 904     | 959.67 | 44.84 | 227                      | 282     | 248     | 252.33 | 27.76 |

Table S4: SkOV3 ground truth and ML prediction counts for  $C_{WBC} = 1000/mL$

| Target | Ground truth conc. (/mL) |         |         |        |       | ML-predicted conc. (/mL) |         |         |        |       |
|--------|--------------------------|---------|---------|--------|-------|--------------------------|---------|---------|--------|-------|
|        | Donor 1                  | Donor 2 | Donor 3 | Mean   | SD    | Donor 1                  | Donor 2 | Donor 3 | Mean   | SD    |
| 0      | 0                        | 0       | 0       | 0      | 0     | 5                        | 2       | 0       | 2.33   | 2.52  |
| 10     | 12                       | 8       | 9       | 9.67   | 2.08  | 5                        | 10      | 15      | 10     | 5     |
| 100    | 87                       | 102     | 91      | 93.33  | 7.77  | 31                       | 24      | 54      | 36.33  | 15.70 |
| 1000   | 911                      | 1033    | 979     | 974.33 | 61.13 | 240                      | 181     | 301     | 240.67 | 60.00 |

Table S5: SkOV3 ground truth and ML prediction counts for  $C_{WBC} = 5000/mL$

| Target | Ground truth conc. (/mL) |         |         |       |       | ML-predicted conc. (/mL) |         |         |        |       |
|--------|--------------------------|---------|---------|-------|-------|--------------------------|---------|---------|--------|-------|
|        | Donor 1                  | Donor 2 | Donor 3 | Mean  | SD    | Donor 1                  | Donor 2 | Donor 3 | Mean   | SD    |
| 0      | 0                        | 0       | 0       | 0     | 0     | 7                        | 2       | 4       | 4.33   | 2.52  |
| 10     | 11                       | 8       | 13      | 10.67 | 2.52  | 6                        | 5       | 12      | 7.67   | 3.79  |
| 100    | 94                       | 105     | 89      | 96    | 8.19  | 33                       | 20      | 44      | 32.33  | 12.01 |
| 1000   | 945                      | 987     | 1026    | 986   | 40.51 | 284                      | 159     | 309     | 250.67 | 80.36 |

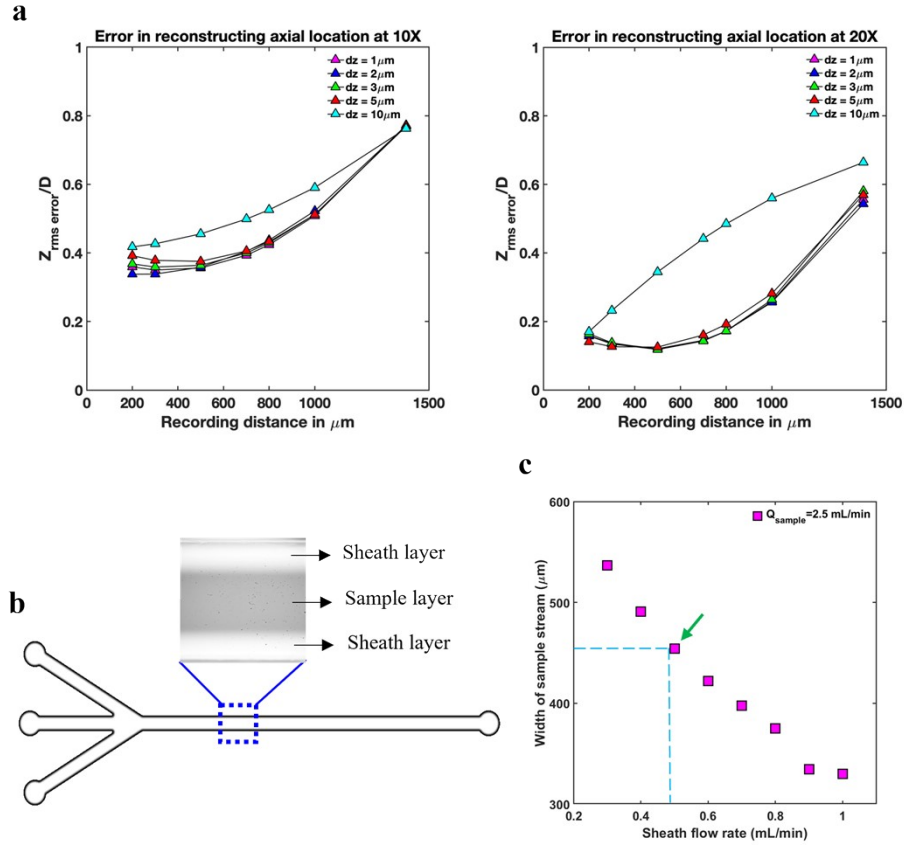

**Figure S1. Optimization of critical DHM parameters and sheath flow conditions.** (a) Normalized RMS error in reconstructing axial positions of  $15\ \mu m$  particles computed for various hologram recording distances tested, ranging from 200 to  $1500\ \mu m$ . Results are reported for 5 spacings between successive reconstruction planes: 1, 2, 3, 5 and  $10\ \mu m$ . Experiments are carried out under two objective magnifications, 10X and 20X; (b) Geometry of sheath microchannel with trifurcating inlets and a single outlet. Inset shows the sheath and sample regions in the image field of view (FOV). A black dye is used to visualize the separate regions and interfaces; (c) The operating sheath flow rate is optimized with respect to the width of the sample layer. Sample flow rate is fixed at  $2.5\text{ mL/min}$ . The selected condition is highlighted by the green arrow.
